# Supplementary material for: Evaluating Neighborhood Correlates and Geospatial Distribution of Breast, Cervical, and Colorectal Cancer Incidence
Source: PubMed Central journal article supplement (PMC6218580; doi:10.3389/fonc.2018.00471), 2018-10-30
Supplement: Table_1.pdf [file Table_1.pdf]

**Supplemental Table 1: Key for Community Statistical Area map**

|                                 |    |                                       |    |
|---------------------------------|----|---------------------------------------|----|
| Allendale/Irvington/S. Hilton   | 1  | Howard Park/West Arlington            | 29 |
| Beechfield/Ten Hills/West       | 2  | Inner Harbor/Federal Hill             | 30 |
| Belair-Edison                   | 3  | Lauraville                            | 31 |
| Brooklyn/Curtis Bay             | 4  | Loch Raven                            | 32 |
| Canton                          | 5  | Madison/East End                      | 33 |
| Cedonia/Frankford               | 6  | Medfield/Hampden/Woodberry/Remington  | 34 |
| Cherry Hill                     | 7  | Midtown                               | 35 |
| Chinquapin Park/Belvedere       | 8  | Midway/Coldstream                     | 36 |
| Claremont/Armistead             | 9  | Morrell Parkk/Violetville             | 37 |
| Clifton-Berea                   | 10 | Mount Washington/Coldspring           | 38 |
| Cross-Country/Cheswolde         | 11 | North Baltimore/Guilford/Homeland     | 39 |
| Dickeyville/Franklinton         | 12 | Northwood                             | 40 |
| Dorchester/Ashburton            | 13 | Oldtown/Middle East                   | 41 |
| Downtown/Seton Hill             | 14 | Orangeville/E. Highlandtown           | 42 |
| Edmonson Village                | 15 | Patterson Park North & East           | 43 |
| Fells Point                     | 16 | Penn North/Reservoir Hill             | 44 |
| Forest Park/Walbrook            | 17 | Pimlico/Arlington/Hilltop             | 45 |
| Glen-Fallstaff                  | 18 | Poppleton/The Terraces/Hollins Market | 46 |
| Greater Charles Village/Barclay | 19 | Sandtown-Winchester/Harlem Park       | 47 |
| Greater Govans                  | 20 | South Baltimore                       | 48 |
| Greater Mondawmin               | 21 | Southeastern                          | 49 |
| Greater Roland Park/Poplar Hill | 22 | Southern Park Heights                 | 50 |
| Greater Rosemont                | 23 | Southwest Baltimore                   | 51 |
| Greenmount East                 | 24 | The Waverlies                         | 52 |
| Hamilton                        | 25 | Upton/Druid Heights                   | 53 |
| Harbor East/Little Italy        | 26 | Washington Village/Pigtown            | 54 |
| Harford/Echodale                | 27 | Westport/Mount Winans/Lakeland        | 55 |
| Highlandtown                    | 28 |                                       |    |
